# Supplementary material for: Factors Associated with the Quality-of-Life of Young Unpaid Carers: A Systematic Review of the Evidence from 2003 to 2019
Source: MDPI journal article supplement (doi:10.3390/ijerph20064807), 2023-03-09
Supplement: s1 [file s1]

**Supplementary Table S1.** Summary of study characteristics of identified studies, including MMAT score

| Source                                                                                                                                  | Year | Setting      | Design (QT/QL/MM)                 | YIC Sample Size | Male/ Female | Age, Mean (SD) or range | Relationship to care-recipient                                                        | Illness of care-recipient                                                                                                  | Theme/measures used                                                                                                                                                                                                                                                                                                                                                                                                                                                                                               | MMAT Score (%) |
|-----------------------------------------------------------------------------------------------------------------------------------------|------|--------------|-----------------------------------|-----------------|--------------|-------------------------|---------------------------------------------------------------------------------------|----------------------------------------------------------------------------------------------------------------------------|-------------------------------------------------------------------------------------------------------------------------------------------------------------------------------------------------------------------------------------------------------------------------------------------------------------------------------------------------------------------------------------------------------------------------------------------------------------------------------------------------------------------|----------------|
| <b>Thomas, Stainton, Jackson et al.</b><br>'Your friends don't understand': Invisibility and unmet need: In the lives of 'young carers' | 2003 | Wales, UK    | QL (focus groups)                 | 27              | 8/13         | Range = 9-18<br>Mean=14 | 12 Parent (primary)<br>6 Parent (secondary)<br>5 Sibling (secondary)<br>4 Undisclosed | Parent<br>15 Sick/Disabled<br>3 Substance abuse/Mental illness<br><br>Sibling<br>3 Sick/Disabled<br>2 Behavioural problems | <ul style="list-style-type: none"> <li>Perceived normality of role and identifying as a carer (parentification; added responsibility rather than role reversal)</li> <li>Social Support from formal and unpaid networks (development of friendships; stigma and isolation compounded by low-income status; healthcare professionals and availability of social services; disclosure of identity to schools)</li> <li>Caring demands (emotional impact)</li> <li>Coping strategies (findings positives)</li> </ul> | 100%           |
| <b>Cree.</b> Worries and problems of young carers: Issues for mental health                                                             | 2003 | Scotland, UK | MM (survey n=50 + interview n=11) | 61              | 25/34        | Range = 5-16            | 41% Parent<br>13% Sibling<br>46% Both                                                 | 40% Physical disability<br>15% Problematic behaviour<br>13% Learning difficulty<br>10% mental illness                      | <ul style="list-style-type: none"> <li>Caring demands (general worries and problems as adolescents on top of those as a carer)</li> <li>Demographic factors: ethnicity (social support and caring demands), age (caring demands), gender (caring demands)</li> <li>Caring situation: length of time caring, existence of high/low risk group</li> </ul>                                                                                                                                                           | 100%           |

**Supplementary Table S1.** Summary of study characteristics of identified studies, including MMAT score

| Source                                                                                                                       | Year | Setting       | Design (QT/QL/MM) | YIC Sample Size | Male/ Female      | Age, Mean (SD) or range         | Relationship to care-recipient                                                         | Illness of care-recipient | Theme/measures used                                                                                                                                                                                                                                                                | MMAT Score (%) |
|------------------------------------------------------------------------------------------------------------------------------|------|---------------|-------------------|-----------------|-------------------|---------------------------------|----------------------------------------------------------------------------------------|---------------------------|------------------------------------------------------------------------------------------------------------------------------------------------------------------------------------------------------------------------------------------------------------------------------------|----------------|
| <b>Eley.</b> 'If they don't recognize it, you've got to deal with it yourself': Gender, young caring and educational support | 2004 | Scotland, UK  | QL (interview)    | 11              | 5/6               | Range=10-17<br>Mean=13          | N/A                                                                                    | N/A                       | <ul style="list-style-type: none"> <li>Demographic factors: gender (caring expectations and demands)</li> <li>Perceived normality of role and identifying as a carer (including recognition from professionals)</li> <li>Social Support from formal and unpaid networks</li> </ul> | 100%           |
| <b>Levine, Hunt, Halper et al.</b><br>Young adult caregivers: A first look at an unstudied population                        | 2005 | United States | QT (survey)       | 134             | 87.98/46.02       | Range=18-25                     | Female family member (65.8%/59.4%)<br>Grandmother (42.2%/24.1%)<br>Mother (7.4%/15.4%) | N/A                       | <ul style="list-style-type: none"> <li>Caring demands</li> <li>Coping strategies</li> <li>Social Support from formal and unpaid networks</li> </ul>                                                                                                                                | 80%            |
| <b>Yahav, Vosburgh &amp; Miller.</b><br>Emotional responses of children and adolescents to parents with multiple sclerosis.  | 2005 | Israel        | QT (survey)       | 56              | 32/24             | Range=10-18<br>Mean=14.69 (2.2) | 56 Parent<br>33 Mother<br>23 Father                                                    | Multiple Sclerosis        | <ul style="list-style-type: none"> <li>Caring demands (gender effect)</li> </ul>                                                                                                                                                                                                   | 60%            |
| <b>Siskowski.</b><br>Young caregivers: effect of family health situations on                                                 | 2006 | United States | QT (survey)       | 6,714/11,029    | ~3343.57/~3370.43 | Range=14-15<br>(37.9%)          | Parents                                                                                | N/A                       | <ul style="list-style-type: none"> <li>Caring demands (gender and ethnicity effect)</li> </ul>                                                                                                                                                                                     | 80%            |

**Supplementary Table S1.** Summary of study characteristics of identified studies, including MMAT score

| Source                                                                                                                                               | Year | Setting     | Design (QT/QL/MM) | YIC Sample Size | Male/ Female | Age, Mean (SD) or range  | Relationship to care-recipient                                                             | Illness of care-recipient                                                                           | Theme/measures used                                                                                                                                                                                                                                                                                                                                                                              | MMAT Score (%) |
|------------------------------------------------------------------------------------------------------------------------------------------------------|------|-------------|-------------------|-----------------|--------------|--------------------------|--------------------------------------------------------------------------------------------|-----------------------------------------------------------------------------------------------------|--------------------------------------------------------------------------------------------------------------------------------------------------------------------------------------------------------------------------------------------------------------------------------------------------------------------------------------------------------------------------------------------------|----------------|
| school performance.                                                                                                                                  |      |             |                   |                 |              | Range=16-18 (15.3%)      |                                                                                            |                                                                                                     |                                                                                                                                                                                                                                                                                                                                                                                                  |                |
| <b>Moore &amp; McArthur.</b> We're all in it together: Supporting young carers and their families in Australia                                       | 2007 | Australia   | QL (interview)    | 50              | 26/24        | Range=9-24               | 26 Mother<br>16 Father/Stepfather<br>19 Brother<br><br>14 cared for more than one relative | 25 Alcohol/Substance abuse<br>18 Mental health<br>13 Physical disability<br>~17 Multiple conditions | <ul style="list-style-type: none"> <li>Perceived normality of role and identifying as a carer (disclosure of caring identity)</li> <li>Social Support from formal and unpaid networks (support from services, problems with services, reluctance to interact within family, promotion of services, impact of support)</li> <li>Caring demands (need for respite, financial hardships)</li> </ul> | 80%            |
| <b>Bolas, Van Wersch &amp; Flynn.</b> The well-being of young people who care for a dependent relative: an interpretative phenomenological analysis. | 2007 | England, UK | QL (interview)    | 5               | 3/2          | Range=14-18<br>Mean=15.2 | 3 Mother<br>1 Step-father<br>1 Brother                                                     | N/A                                                                                                 | <ul style="list-style-type: none"> <li>Perceived normality of role and identifying as a carer (making sense of identity and choice over caring; disclosure of caring identity)</li> <li>Social Support from formal and unpaid networks (isolation; illness-related stigma)</li> </ul>                                                                                                            | 80%            |

**Supplementary Table S1.** Summary of study characteristics of identified studies, including MMAT score

| Source                                                                                                                                                   | Year | Setting                                                                                    | Design (QT/QL/MM)               | YIC Sample Size | Male/ Female  | Age, Mean (SD) or range                           | Relationship to care-recipient                                        | Illness of care-recipient                                                                                                                                                                                     | Theme/measures used                                                                                                                                                                                                                                                                                                                                                                         | MMAT Score (%) |
|----------------------------------------------------------------------------------------------------------------------------------------------------------|------|--------------------------------------------------------------------------------------------|---------------------------------|-----------------|---------------|---------------------------------------------------|-----------------------------------------------------------------------|---------------------------------------------------------------------------------------------------------------------------------------------------------------------------------------------------------------|---------------------------------------------------------------------------------------------------------------------------------------------------------------------------------------------------------------------------------------------------------------------------------------------------------------------------------------------------------------------------------------------|----------------|
| <b>Pakenham, Chiu, Bursnall et al.</b><br>Relations between social support, appraisal and coping and both positive and negative outcomes in young carers | 2007 | Australia                                                                                  | QT (survey)                     | 100             | 28/72         | Range=10-25<br>Mean = 16.28 (3.75)                | Parent<br>76 Mother<br>16 Father<br>7 Both                            | 68 Physical illness<br>18 Mental illness<br>7 Physical disability<br>2 Sensory disability<br>2 Brain injury<br>1 Alcohol and/or drug problem<br>2 Other<br>21 Parent has additional illness(es)/disability(s) | <ul style="list-style-type: none"> <li>Social Support from formal and unpaid networks (young people who gain support better adjust to caring)</li> <li>Caring demands (stress appraisal, distress) → Brief symptoms Inventory, Bradburn Affect Balance Scale, Satisfaction with Life Scale</li> <li>Coping strategies → Benefit Finding scale</li> </ul>                                    | 80%            |
| <b>Earley, Cushway, &amp; Cassidy.</b><br>Children's perceptions and experiences of care giving: a focus group study                                     | 2007 | Europe (exact setting not mentioned, supposed Ireland or UK based on academic affiliation) | QL (interview + 2 focus groups) | 17              | 13/4          | Range=10-16<br>FG1: Mean=13.11<br>FG2: Mean=11.39 | 4 Brother<br>4 Sister<br>5 Mother<br>1 Grandparent<br>4 more than one | 7 Learning disability<br>3 Physical disability<br>5 Chronic Illness<br>2 Combination                                                                                                                          | <ul style="list-style-type: none"> <li>Perceived normality of role and identifying as a carer (perceptions of responsibility, identity and transition into adulthood)</li> <li>Social Support from formal and unpaid networks (social restrictions)</li> <li>Caring demands (stigma, bullying, burden of responsibility)</li> <li>Coping strategies (regulating, helping others)</li> </ul> | 100%           |
| <b>McMahon &amp; Luthar.</b> Defining Characteristics and Potential Consequences of                                                                      | 2007 | United States                                                                              | QT (survey)                     | 356             | 163.76/192.24 | Range=8-17<br>Mean=12.07                          | All Mothers                                                           | Mental health /Substance abuse                                                                                                                                                                                | <ul style="list-style-type: none"> <li>Perceived normality of role and identifying as a carer (parentification)</li> <li>Caring demands → Child Caretaking Scale (caretaking</li> </ul>                                                                                                                                                                                                     | 100%           |

**Supplementary Table S1.** Summary of study characteristics of identified studies, including MMAT score

| Source                                                                                               | Year | Setting       | Design (QT/QL/MM) | YIC Sample Size | Male/ Female | Age, Mean (SD) or range                                                                            | Relationship to care-recipient     | Illness of care-recipient                                             | Theme/measures used                                                                                                                                                                                                                                                                                                                                                                                                                                                                                                                            | MMAT Score (%) |
|------------------------------------------------------------------------------------------------------|------|---------------|-------------------|-----------------|--------------|----------------------------------------------------------------------------------------------------|------------------------------------|-----------------------------------------------------------------------|------------------------------------------------------------------------------------------------------------------------------------------------------------------------------------------------------------------------------------------------------------------------------------------------------------------------------------------------------------------------------------------------------------------------------------------------------------------------------------------------------------------------------------------------|----------------|
| Caretaking Burden Among Children Living in Urban Poverty                                             |      |               |                   |                 |              |                                                                                                    |                                    |                                                                       | <p>burden from perspective of children), Behavioural Assessment System for Children (emotional-behavioural disturbance and competence in children), Clinical Maladjustment and School Maladjustment from the Self-Report of Personality (emotional distress and alienation from school), Internalizing Problems and Externalizing Problems from the Parent-Rating Scales (emotional-behavioural disturbance in the children from mother perspective)</p> <ul style="list-style-type: none"> <li>Demographic factors: ethnicity, SES</li> </ul> |                |
| <b>Fruhauf &amp; Orel.</b><br>Developmental issues of grandchildren who provide care to grandparents | 2008 | United States | QL (interview)    | 34              | 15/19        | <p>17 people aged 7-17<br/>Mean=12.5,(3.12)</p> <p>17 people aged 21-19<br/>Mean=24.12, (2.67)</p> | All Grandparents, aged 67-93 years | <p>N/A</p> <p>(mentions of cognitive and/or physical limitations)</p> | <ul style="list-style-type: none"> <li>Perceived normality of role and identifying as a carer (disclosure of caring identity)</li> <li>Social Support from formal and unpaid networks (school; family cohesion; worry and guilt)</li> <li>Caring demands (burden of responsibility, physical demands)</li> </ul>                                                                                                                                                                                                                               | 100%           |

**Supplementary Table S1.** Summary of study characteristics of identified studies, including MMAT score

| Source                                                                                                                   | Year | Setting     | Design (QT/QL/MM) | YIC Sample Size | Male/ Female | Age, Mean (SD) or range | Relationship to care-recipient                                                                                           | Illness of care-recipient                                                                                                                                                                                     | Theme/measures used                                                                                                                                                                                                                                                                   | MMAT Score (%) |
|--------------------------------------------------------------------------------------------------------------------------|------|-------------|-------------------|-----------------|--------------|-------------------------|--------------------------------------------------------------------------------------------------------------------------|---------------------------------------------------------------------------------------------------------------------------------------------------------------------------------------------------------------|---------------------------------------------------------------------------------------------------------------------------------------------------------------------------------------------------------------------------------------------------------------------------------------|----------------|
|                                                                                                                          |      |             |                   |                 |              |                         |                                                                                                                          |                                                                                                                                                                                                               | <ul style="list-style-type: none"> <li>Coping strategies (regulating, respite)</li> </ul>                                                                                                                                                                                             |                |
| <b>Metzing-Blau &amp; Schnepf.</b> Young carers in Germany: to live on as normal as possible - a grounded theory study.  | 2008 | Germany     | QL (interview)    | 41              | 16/25        | Range = 8-19            | 23 Mothers (67.6%)<br>7 Fathers (20.6%)<br>1 Grandmother (2.9%)<br>2 Siblings (5.9%)<br>1 Parents and Grandparent (2.9%) | 21 somatically ill: Multiple Sclerosis, Stroke, Parkinson's Disease, Asthma, Cardiac Insufficiency, Cancer<br>9 mental illness: Depression, Psychosis, PTSD<br>4 both (somatically as well as a mentally ill) | <ul style="list-style-type: none"> <li>Social Support from formal and unpaid networks (isolation; bureaucratic hurdles; distrust from support services)</li> <li>Demographic factors: SES</li> </ul>                                                                                  | 100%           |
| <b>Östman.</b> Interviews with children of persons with a severe mental illness - Investigating their everyday situation | 2008 | Sweden      | QL (interview)    | 8               | 3/5          | Range=10-18             | 7 Mothers<br>1 Father                                                                                                    | Mental Illness (schizophrenia and affective disorder)                                                                                                                                                         | <ul style="list-style-type: none"> <li>Perceived normality of role and identifying as a carer (disclosure of caring identity)</li> <li>Caring demands (stigma, feeling of loneliness, experience of fear and blame)</li> <li>Coping strategies (maturity, love for family)</li> </ul> | 100%           |
| <b>Allen, Oyeboode &amp; Allen.</b> Having a father with young onset dementia: The impact on well-                       | 2009 | England, UK | QL (interview)    | 12              | 5/7          | Range=13-23<br>Mean=19  | All Fathers, aged 51-64 years                                                                                            | Young onset Dementia<br>Alzheimer's disease<br>Vascular dementia<br>Front-temporal dementia                                                                                                                   | <ul style="list-style-type: none"> <li>Perceived normality of role and identifying as a carer (reconfiguration of parental relationship; parentification; balancing responsibilities with youth)</li> </ul>                                                                           | 100%           |

**Supplementary Table S1.** Summary of study characteristics of identified studies, including MMAT score

| Source                                                                                                                                                                                                | Year | Setting                     | Design (QT/QL/MM)        | YIC Sample Size | Male/ Female | Age, Mean (SD) or range       | Relationship to care-recipient            | Illness of care-recipient                                                                                                                  | Theme/measures used                                                                                                                                                                                                                                                                                                                                                                                                                   | MMAT Score (%) |
|-------------------------------------------------------------------------------------------------------------------------------------------------------------------------------------------------------|------|-----------------------------|--------------------------|-----------------|--------------|-------------------------------|-------------------------------------------|--------------------------------------------------------------------------------------------------------------------------------------------|---------------------------------------------------------------------------------------------------------------------------------------------------------------------------------------------------------------------------------------------------------------------------------------------------------------------------------------------------------------------------------------------------------------------------------------|----------------|
| being of young people                                                                                                                                                                                 |      |                             |                          |                 |              |                               |                                           |                                                                                                                                            | <ul style="list-style-type: none"> <li>• Social Support from formal and unpaid networks (lack of help from relatives)</li> <li>• Caring demands (physical and psychological strain, stigma, worry about parent, caregiving strain, difficulties related to illness)</li> <li>• Coping strategies (problem or emotion focused)</li> </ul>                                                                                              |                |
| <b>Fraser &amp; Pakenham.</b><br>Resilience in children of parents with mental illness: Relations between mental health literacy, social connectedness and coping, and both adjustment and caregiving | 2009 | Australia                   | QT (survey)              | 44              | 17/27        | Range=12-17<br>Mean=13 (1.58) | 33 Mother<br>4 Father<br>7 Both           | 19 Depression<br>11 BPD<br>14 Psychosis/Schizophrenia<br>8 Drug Abuse<br>4 Personality disorder<br>1 Eating disorder<br>7 Anxiety disorder | <ul style="list-style-type: none"> <li>• Social Support from formal and unpaid networks (Social Connectedness Scale; isolation and prosocial behaviour)</li> <li>• Caring demands (Children's Depression Inventory; Satisfaction with Life Scale; Strengths and Difficulties Questionnaire; Young Caregiver of Parents Inventory)</li> <li>• Coping strategies (Responses to Stress Questionnaire – Family Stress Version)</li> </ul> | 80%            |
| <b>Svanberg, Stott &amp; Spector.</b> 'Just Helping': children living with a parent                                                                                                                   | 2010 | UK (no further information) | MM. (interview + survey) | 12              | 6/9          | Range=11-17<br>Mean=14.6      | All parents, aged 39-59 years (Mean=50.7) | 5 Alzheimer's disease<br>2 Pick's disease<br>2 vascular dementia<br>1 no formal diagnosis made, although Pick's                            | <ul style="list-style-type: none"> <li>• Perceived normality of role and identifying as a carer (pride in their caring roles)</li> <li>• Caring demands: Recent Mood and Feelings</li> </ul>                                                                                                                                                                                                                                          | 60%            |

**Supplementary Table S1.** Summary of study characteristics of identified studies, including MMAT score

| Source                                                                                                                                                 | Year | Setting   | Design (QT/QL/MM) | YIC Sample Size | Male/ Female | Age, Mean (SD) or range          | Relationship to care-recipient     | Illness of care-recipient                                      | Theme/measures used                                                                                                                                                                                                                                                                                                                                                                                                                                                  | MMAT Score (%) |
|--------------------------------------------------------------------------------------------------------------------------------------------------------|------|-----------|-------------------|-----------------|--------------|----------------------------------|------------------------------------|----------------------------------------------------------------|----------------------------------------------------------------------------------------------------------------------------------------------------------------------------------------------------------------------------------------------------------------------------------------------------------------------------------------------------------------------------------------------------------------------------------------------------------------------|----------------|
| with young onset dementia.                                                                                                                             |      |           |                   |                 |              |                                  |                                    | disease had been suspected                                     | <ul style="list-style-type: none"> <li>Questionnaire, Zarit Burden Interview-Short</li> <li>Coping strategies: Resilience Scale</li> </ul>                                                                                                                                                                                                                                                                                                                           |                |
| <b>Ireland &amp; Pakenham.</b><br>Youth adjustment to parental illness or disability: The role of illness characteristics, caregiving, and attachment. | 2010 | Australia | QT (survey)       | 81              | 28/53        | Range=10-25<br>Mean 16.31 (3.36) | 56 Mothers<br>17 Fathers<br>8 Both | 28 Physical illness/disability<br>35 Mental Illness<br>18 Both | <ul style="list-style-type: none"> <li>Social Support from formal and unpaid networks (young people who seek support better adjust to caring)</li> <li>Caring demands: Young Caregiver of Parents Inventory (YCOPI), Strengths and Difficulties Questionnaire (emotional symptoms, conduct problems, hyperactivity/inattention, peer problems and prosocial behaviour)</li> <li>Coping strategies: (resiliency – Inventory of Parent and Peer Attachment)</li> </ul> | 80%            |
| <b>Moore, McArthur &amp; Noble-Carr.</b><br>Different but the same? Exploring the experiences of young people caring for a parent with an              | 2011 | Australia | QL (interview)    | 15              | 7/8          | Range=11-17                      | 8 Mothers<br>5 Fathers             | Substance abuse problems                                       | <ul style="list-style-type: none"> <li>Perceived normality of role and identifying as a carer (“doesn’t sound right” especially if lower levels of care)</li> <li>Social Support from formal and unpaid networks (isolation and prosocial behaviour; need for</li> </ul>                                                                                                                                                                                             | 100%           |



**Supplementary Table S1.** Summary of study characteristics of identified studies, including MMAT score

| Source                                                                                                                                                                                   | Year | Setting      | Design (QT/QL/MM) | YIC Sample Size | Male/ Female                                   | Age, Mean (SD) or range | Relationship to care-recipient                                        | Illness of care-recipient                                                                                                 | Theme/measures used                                                                                                                                                                                                                                                                                                                                                                                                          | MMAT Score (%) |
|------------------------------------------------------------------------------------------------------------------------------------------------------------------------------------------|------|--------------|-------------------|-----------------|------------------------------------------------|-------------------------|-----------------------------------------------------------------------|---------------------------------------------------------------------------------------------------------------------------|------------------------------------------------------------------------------------------------------------------------------------------------------------------------------------------------------------------------------------------------------------------------------------------------------------------------------------------------------------------------------------------------------------------------------|----------------|
| alcohol or other drug issue.                                                                                                                                                             |      |              |                   |                 |                                                |                         |                                                                       |                                                                                                                           | <ul style="list-style-type: none"> <li>empathetic, responsive healthcare professionals)</li> <li>• Caring demands (types of caring, impact of caring, stigma, isolation, needs of young people)</li> <li>• Coping strategies (resiliency)</li> <li>• Demographic factors: SES</li> </ul>                                                                                                                                     |                |
| <b>Smyth, Blaxland &amp; Cass.</b> 'So that's how I found out I was a young carer and that I actually had been a carer most of my life'. Identifying and supporting hidden young carers. | 2011 | Australia    | QL (interview)    | 68              | N/A<br><br>(mentions of gender through quotes) | Range=11-25             | Mentions of mothers and siblings                                      | N/A<br><br>(mentions of cared-for siblings having mental disabilities and visual impairment)                              | <ul style="list-style-type: none"> <li>• Perceived normality of role and identifying as a carer (disclosure of caring identity; recognising oneself as carer through interaction with others, caring embedded within a normative framework of familial obligations and responsibilities)</li> <li>• Social Support from formal and unpaid networks (stigma compounded by low-income; bullying and home-schooling)</li> </ul> | 100%           |
| <b>Barry.</b> 'I realised that I wasn't alone': The views and experiences of young carers from a social                                                                                  | 2011 | Scotland, UK | QL (interview)    | 20              | 10/10                                          | Range=12-23             | 9 Mothers<br>4 Siblings<br>4 Both parents<br>2 Father<br>1 Stepfather | N/A<br><br>(Mentions of mental or physical disabilities, mental health problems, ADHD, alcoholism and physical illnesses) | <ul style="list-style-type: none"> <li>• Perceived normality of role and identifying as a carer (different perceptions – no resentment but tensions within household)</li> <li>• Social Support from formal and unpaid networks</li> </ul>                                                                                                                                                                                   | 100%           |

**Supplementary Table S1.** Summary of study characteristics of identified studies, including MMAT score

| Source                                                                                                                                                                                                                             | Year | Setting       | Design (QT/QL/MM) | YIC Sample Size | Male/ Female | Age, Mean (SD) or range        | Relationship to care-recipient                  | Illness of care-recipient | Theme/measures used                                                                                                                                                                                                                                                                                                | MMAT Score (%) |
|------------------------------------------------------------------------------------------------------------------------------------------------------------------------------------------------------------------------------------|------|---------------|-------------------|-----------------|--------------|--------------------------------|-------------------------------------------------|---------------------------|--------------------------------------------------------------------------------------------------------------------------------------------------------------------------------------------------------------------------------------------------------------------------------------------------------------------|----------------|
| capital perspective                                                                                                                                                                                                                |      |               |                   |                 |              |                                |                                                 |                           | (teachers, schools, friends, worry and guilt) <ul style="list-style-type: none"> <li>• Caring demands (stigma/embarrassment, worry about the future, school as respite)</li> <li>• Coping strategies (family closeness)</li> </ul>                                                                                 |                |
| <b>Moyson &amp; Roeyers.</b> The overall quality of my life as a sibling is all right, but of course, it could always be better'. Quality of life of siblings of children with intellectual disability: the siblings' perspectives | 2012 | Belgium       | QL (interview)    | 50              | 23/27        | Range=6-14<br>Mean=9.16 (2.04) | All Siblings (30 Younger, 18 Older, 2 Twin)     | Intellectual disability   | <ul style="list-style-type: none"> <li>• Social Support from formal and unpaid networks (respite, support from parents)</li> <li>• Caring demands (stress from misunderstanding, respite)</li> <li>• Coping strategies (ignoring behaviour, trying to understand, adapting to it, isolating themselves)</li> </ul> | 100%           |
| <b>Graff, Mandileco, Dyches et al.</b> Perspectives of adolescent siblings of children with Down syndrome                                                                                                                          | 2012 | United States | QL (interview)    | 23              | 11/12        | Range=12-19<br>Mean= 16 (2.15) | Younger siblings, mean age 12 years (SD = 2.53) | Down Syndrome             | <ul style="list-style-type: none"> <li>• Caring demands (negative aspects of caring, impact on family and parents)</li> <li>• Coping strategies (positive aspects of caring)</li> </ul>                                                                                                                            | 100%           |

**Supplementary Table S1.** Summary of study characteristics of identified studies, including MMAT score

| Source                                                                                                       | Year | Setting                     | Design (QT/QL/MM) | YIC Sample Size | Male/ Female             | Age, Mean (SD) or range | Relationship to care-recipient                  | Illness of care-recipient                                                                                                                                      | Theme/measures used                                                                                                                                                                                                                                                                                                                                                                                       | MMAT Score (%) |
|--------------------------------------------------------------------------------------------------------------|------|-----------------------------|-------------------|-----------------|--------------------------|-------------------------|-------------------------------------------------|----------------------------------------------------------------------------------------------------------------------------------------------------------------|-----------------------------------------------------------------------------------------------------------------------------------------------------------------------------------------------------------------------------------------------------------------------------------------------------------------------------------------------------------------------------------------------------------|----------------|
| who have multiple health problems                                                                            |      |                             |                   |                 |                          |                         |                                                 |                                                                                                                                                                |                                                                                                                                                                                                                                                                                                                                                                                                           |                |
| <b>Hamilton &amp; Adamson.</b><br>Bounded agency in young carers' life course-stage domains and transitions. | 2013 | Australia                   | QL (interview)    | 33              | 19/14                    | Range=7-25              | 16 Mothers<br>7 Fathers<br>18 Siblings + others | 23 Physical illness<br>17 Mental Illness<br>13 Intellectual disability<br>12 Long-term illness<br>11 Sensory difficulties<br>6 AOD<br>11 imited mobility/other | <ul style="list-style-type: none"> <li>Perceived normality of role and identifying as a carer (gradual pathway into care, perceived constraints)</li> <li>Social Support from formal and unpaid networks (social relationships, services and gaps identified)</li> <li>Caring demands (health and wellbeing, questions and constraints over thinking of the future, employment, and education)</li> </ul> | 100%           |
| <b>Collins &amp; Bayless.</b> How caring for a parent affects the psychosocial development of the young.     | 2013 | UK (no further information) | QT (survey)       | 20              | N/A                      | Range=11-18             | Parent                                          | N/A                                                                                                                                                            | <ul style="list-style-type: none"> <li>Caring demands: Strengths and Difficulties Questionnaire (behavioural strengths and difficulties), Satisfaction with Life Scale (life satisfaction), Visual Analogue Self-Esteem Scales (self-esteem)</li> </ul>                                                                                                                                                   | 80%            |
| <b>Heyman &amp; Heyman.</b> 'The sooner you can change their life course the better':                        | 2013 | England, UK                 | QL (interview)    | 13              | N/A<br>(mentions gender) | Range=16-29             | N/A                                             | N/A                                                                                                                                                            | <ul style="list-style-type: none"> <li>Perceived normality of role and identifying as a carer (not seeing themselves as vulnerable)</li> </ul>                                                                                                                                                                                                                                                            | 60%            |

**Supplementary Table S1.** Summary of study characteristics of identified studies, including MMAT score

| Source                                                                                                                    | Year | Setting | Design (QT/QL/MM)        | YIC Sample Size | Male/ Female    | Age, Mean (SD) or range | Relationship to care-recipient | Illness of care-recipient | Theme/measures used                                                                                                                                                                                                                                                                                              | MMAT Score (%) |
|---------------------------------------------------------------------------------------------------------------------------|------|---------|--------------------------|-----------------|-----------------|-------------------------|--------------------------------|---------------------------|------------------------------------------------------------------------------------------------------------------------------------------------------------------------------------------------------------------------------------------------------------------------------------------------------------------|----------------|
| the time-framing of risks in relationship to being a young carer                                                          |      |         |                          |                 | through quotes) |                         |                                |                           | <ul style="list-style-type: none"> <li>• Social Support from formal and unpaid networks (services not perceived as helpful to help them plan future, insensitive education system)</li> <li>• Caring demands (identification of stresses)</li> <li>• Coping strategies (identifications of positives)</li> </ul> |                |
| <b>Ali, Ahlström, Krevers et al.</b> Support for young unpaid carers of persons with mental illness: A mixed-method study | 2013 | Sweden  | MM. (interview + survey) | 253             | 74/179          | Range=16-15             | N/A                            | Mental illness            | <ul style="list-style-type: none"> <li>• Social Support from formal and unpaid networks (isolation, meaningful relationships, very few had professional support, but some said web-based support was helpful)</li> <li>• Caring demands (loneliness, anxiety)</li> </ul>                                         | 80%            |
| <b>Nichols, Fam, Cook et al.</b> When dementia is in the house: Needs assessment survey for young caregivers              | 2013 | Canada  | QL (interview)           | 14              | 4/10            | Range=11-18             | Parent                         | Dementia (FTD)            | <ul style="list-style-type: none"> <li>• Perceived normality of role and identifying as a carer (balancing caring with youth)</li> <li>• Social Support from formal and unpaid networks (friends; family; guidelines from health professionals)</li> <li>• Caring demands (emotional impact)</li> </ul>          | 100%           |

**Supplementary Table S1.** Summary of study characteristics of identified studies, including MMAT score

| Source                                                                                                                                   | Year | Setting              | Design (QT/QL/MM) | YIC Sample Size | Male/ Female                     | Age, Mean (SD) or range        | Relationship to care-recipient                                                                                                                                                                       | Illness of care-recipient                                                                                                                                                                                                                                        | Theme/measures used                                                                                                                                                                                                                                                                                                                                                                                              | MMAT Score (%) |
|------------------------------------------------------------------------------------------------------------------------------------------|------|----------------------|-------------------|-----------------|----------------------------------|--------------------------------|------------------------------------------------------------------------------------------------------------------------------------------------------------------------------------------------------|------------------------------------------------------------------------------------------------------------------------------------------------------------------------------------------------------------------------------------------------------------------|------------------------------------------------------------------------------------------------------------------------------------------------------------------------------------------------------------------------------------------------------------------------------------------------------------------------------------------------------------------------------------------------------------------|----------------|
|                                                                                                                                          |      |                      |                   |                 |                                  |                                |                                                                                                                                                                                                      |                                                                                                                                                                                                                                                                  | <ul style="list-style-type: none"> <li>Coping strategies (sense of reward, relationship with family)</li> </ul>                                                                                                                                                                                                                                                                                                  |                |
| <b>Sieh, Visser-Meily, &amp; Meijer.</b><br>Differential Outcomes of Adolescents with Chronically Ill and Healthy Parents                | 2013 | Netherlands          | QT (survey)       | 161             | 77.924/83.08                     | Range=10-20<br>Mean=15.1 (2.3) | Parent (67% female)                                                                                                                                                                                  | Multiple sclerosis (28.2%)<br>Rheumatoid arthritis (19.4%)<br>Brain damage (16.5%)<br>Muscle disease (14.6%)<br>Spinal cord injury (6.8%)<br>Inflammatory bowel disease (5.8%)<br>Parkinson disease (5.8%)<br>Diabetes type I with physical complications (2.9%) | <ul style="list-style-type: none"> <li>Caring demands (Young Caregiver of Parents Inventory (YCOPI), Daily Hassles Questionnaire (Stress and Coping Variables), Youth self-report of problem behaviour)</li> <li>Social Support from formal and unpaid networks (Inventory of Parent and Peer Attachment; isolation and prosocial behaviour)</li> <li>Coping strategies (Daily Hassles Questionnaire)</li> </ul> | 80%            |
| <b>Llyod.</b> Happiness and Well-Being of Young Carers: Extent, Nature and Correlates of Caring Among 10 and 11 Year Old School Children | 2013 | Northern Ireland, UK | QT (survey)       | 192/4192        | Of total sample: 1970.24/2221.76 | Range=10-11                    | Grandmother (44%),<br>Mother (33%)<br>Brother (33%)<br>Grandfather (27%)<br>Father (26%)<br>Sister (26%)<br><br>57% of the children helped look after one person<br>16% helped look after two people | N/A                                                                                                                                                                                                                                                              | <ul style="list-style-type: none"> <li>Caring demands: KIDSCREEN (health-related quality of life)</li> </ul>                                                                                                                                                                                                                                                                                                     | 60%            |

**Supplementary Table S1.** Summary of study characteristics of identified studies, including MMAT score

| Source                                                                                         | Year | Setting                     | Design (QT/QL/MM) | YIC Sample Size | Male/ Female | Age, Mean (SD) or range         | Relationship to care-recipient                                               | Illness of care-recipient                                                                                                              | Theme/measures used                                                                                                                                                                                                                                                                                                                                                                        | MMAT Score (%) |
|------------------------------------------------------------------------------------------------|------|-----------------------------|-------------------|-----------------|--------------|---------------------------------|------------------------------------------------------------------------------|----------------------------------------------------------------------------------------------------------------------------------------|--------------------------------------------------------------------------------------------------------------------------------------------------------------------------------------------------------------------------------------------------------------------------------------------------------------------------------------------------------------------------------------------|----------------|
|                                                                                                |      |                             |                   |                 |              |                                 | 27% helped to look after three or more people                                |                                                                                                                                        |                                                                                                                                                                                                                                                                                                                                                                                            |                |
| <b>Cassidy, Giles, &amp; McLaughlin.</b> Benefit finding and resilience in child caregivers    | 2014 | UK (no further information) | QT (survey)       | 442             | 174/268      | Range=12-16<br>Mean=13.4 (1.38) | 203 Parent<br>168 Sibling<br>71 More than one family member                  | 143 chronic illness<br>106 learning disability<br>47 physical disability<br>76 mental illness<br>70 with a combination of caring needs | <ul style="list-style-type: none"> <li>• Social Support from formal and unpaid networks: Perceived Social Support Scale</li> <li>• Caring demands: The General Health Questionnaire, The Perceived Impact of Child Caregiving Scale</li> <li>• Coping strategies: Adolescent Coping Scale-short form, The Brief Resilience Scale, The Benefit-Finding in Child Caregivers Scale</li> </ul> | 60%            |
| <b>Millenaar, Van Vliet, Bakker et al.</b> The experiences and needs of children living with a | 2014 | Netherlands                 | QL (interview)    | 14              | 6/8          | Range=15-27<br>Mean=21          | Parent<br>3 Mothers<br>11 Fathers<br><br>The mean age of the parent was 53.6 | 5 Alzheimer's disease<br>4 fronto-temporal dementia (2 with the behavioral variant and 2 with primary progressive aphasia)             | <ul style="list-style-type: none"> <li>• Social Support from formal and unpaid networks (children need of care and support)</li> </ul>                                                                                                                                                                                                                                                     | 100%           |

**Supplementary Table S1.** Summary of study characteristics of identified studies, including MMAT score

| Source                                                                                                                                                            | Year | Setting       | Design (QT/QL/MM)       | YIC Sample Size | Male/ Female | Age, Mean (SD) or range | Relationship to care-recipient         | Illness of care-recipient                                 | Theme/measures used                                                                                                                                                                                                                                                                                       | MMAT Score (%) |
|-------------------------------------------------------------------------------------------------------------------------------------------------------------------|------|---------------|-------------------------|-----------------|--------------|-------------------------|----------------------------------------|-----------------------------------------------------------|-----------------------------------------------------------------------------------------------------------------------------------------------------------------------------------------------------------------------------------------------------------------------------------------------------------|----------------|
| parent with young onset dementia: Results from the NeedYD study                                                                                                   |      |               |                         |                 |              |                         | years (SD 4.5, range 47–62)            | 1 vascular dementia<br>1 dementia not otherwise specified | <ul style="list-style-type: none"> <li>Caring demands (impact of dementia on daily life, anxieties about future)</li> <li>Coping strategies (different ways of coping with the disease)</li> </ul>                                                                                                        |                |
| <b>Pakenham, &amp; Cox.</b><br>Comparisons between youth of a parent with MS and a control group on adjustment, caregiving, attachment and family functioning.    | 2014 | Australia     | QT (survey)             | 126             | 58/68        | Mean=14.04 (3.00)       | Parent                                 | Multiple Sclerosis                                        | <ul style="list-style-type: none"> <li>Social Support from formal and unpaid networks: Inventory of Parent and Peer Attachment, Family Environment Scale</li> <li>Caring demands: Young Carers of Parents Inventory (YCOPI), Strengths and Difficulties Questionnaire, Brief Symptom Inventory</li> </ul> | 80%            |
| <b>Kavanaugh.</b><br>Children and Adolescents Providing Care to a Parent with Huntington's Disease: Disease Symptoms, Caregiving Tasks and Young Carer Well-Being | 2014 | United States | MM (interview + survey) | 40              | 9/31         | Range=12-20             | 40 Parents<br>25 Mothers<br>15 Fathers | Huntington's Disease                                      | <ul style="list-style-type: none"> <li>Caring demands: Young Carers of Parents Inventory (YCOPI), Children's Depression Inventory, Conflict Behaviour Questionnaire, the Multidimensional Assessment of Caring Activities (MACA)</li> </ul>                                                               | 60%            |

**Supplementary Table S1.** Summary of study characteristics of identified studies, including MMAT score

| Source                                                                                                                                                                                                    | Year | Setting       | Design (QT/QL/MM) | YIC Sample Size | Male/ Female                     | Age, Mean (SD) or range | Relationship to care-recipient                                                     | Illness of care-recipient                                                    | Theme/measures used                                                                                                                                                                                                                                               | MMAT Score (%) |
|-----------------------------------------------------------------------------------------------------------------------------------------------------------------------------------------------------------|------|---------------|-------------------|-----------------|----------------------------------|-------------------------|------------------------------------------------------------------------------------|------------------------------------------------------------------------------|-------------------------------------------------------------------------------------------------------------------------------------------------------------------------------------------------------------------------------------------------------------------|----------------|
| <b>Pakenham &amp; Cox.</b> The effects of parental illness and other ill family members on youth caregiving experiences.                                                                                  | 2015 | Australia     | QT (survey)       | 706/2474        | 967.04/1506.96 (of total sample) | Range=9-20              | 336 Parents<br>254 Other, including:<br>96 Grandparents<br>99 Siblings<br>116 Both | Physical illness or disability, Mental illness, Alcohol and/or drug problems | <ul style="list-style-type: none"> <li>Caring demands: Young Carers of Parents Inventory (YCOPI)</li> </ul>                                                                                                                                                       | 100%           |
| <b>Kavanaugh, Noh &amp; Studer.</b> "It'd be nice if someone asked me how I was doing. Like, 'cause I will have an answer": exploring support needs of young carers of a parent with Huntington's disease | 2015 | United States | QL (interview)    | 40              | 9/31                             | Range=12-20             | 40 Parents<br>25 Mothers<br>15 Fathers                                             | Huntington's Disease                                                         | <ul style="list-style-type: none"> <li>Social Support from formal and unpaid networks (types of support: instrumental, emotional, and personal needs; peer support groups; isolation; difficulties in development of friendships)</li> </ul>                      | 100%           |
| <b>Kavanaugh, Noh, Zhang et al.</b> Caregiving Youth Knowledge and Perceptions of Parental End-of-Life Wishes in                                                                                          | 2016 | United States | QL (interview)    | 40              | 9/31                             | Range=12-20             | 40 Parents<br>25 Mothers<br>15 Fathers                                             | Huntington's Disease                                                         | <ul style="list-style-type: none"> <li>Perceived normality of role and identifying as a carer (caregiving responsibility)</li> <li>Social Support from formal and unpaid networks (respect of parental and caregiver wishes about the future and care)</li> </ul> | 100%           |



**Supplementary Table S1.** Summary of study characteristics of identified studies, including MMAT score

| Source                                                                                                                                                                      | Year | Setting       | Design (QT/QL/MM) | YIC Sample Size                      | Male/ Female                        | Age, Mean (SD) or range     | Relationship to care-recipient      | Illness of care-recipient | Theme/measures used                                                                                                                                                                                                                                                                       | MMAT Score (%) |
|-----------------------------------------------------------------------------------------------------------------------------------------------------------------------------|------|---------------|-------------------|--------------------------------------|-------------------------------------|-----------------------------|-------------------------------------|---------------------------|-------------------------------------------------------------------------------------------------------------------------------------------------------------------------------------------------------------------------------------------------------------------------------------------|----------------|
| Huntington's Disease                                                                                                                                                        |      |               |                   |                                      |                                     |                             |                                     |                           |                                                                                                                                                                                                                                                                                           |                |
| <b>Meltzer.</b> 'I couldn't just entirely be her sister': The relational and social policy implications of care between young adult siblings with and without disabilities. | 2017 | Australia     | QL (interview)    | 21/46                                | 22/24 (of total sample)             | Range=15-29                 | 25 Siblings                         | Disability                | <ul style="list-style-type: none"> <li>Perceived normality of role and identifying as a carer (framing of the care, double identity – sister and carer)</li> <li>Social Support from formal and unpaid networks (helping within family)</li> <li>Caring demands (caring tasks)</li> </ul> | 100%           |
| <b>Greene, Cohen, Siskowski et al.</b> The Relationship Between Family Caregiving and the Mental Health of Emerging Young Adult Caregivers.                                 | 2017 | United States | QT (survey)       | 157/353 (non-carer comparison group) | 34/123 (excludes non-carer: 36/160) | No Range. Mean=20.79 (1.64) | Parent & Grandparent                | N/A                       | <ul style="list-style-type: none"> <li>Caring demands: Center for Epidemiological Studies of Depression Scale, State-Trait Anxiety Inventory, Rosenberg Self-Esteem Scale, Response to Stress Questionnaire</li> </ul>                                                                    | 100%           |
| <b>Moberg, Larsen, &amp; Brødsgaard.</b> Striving for balance between caring and                                                                                            | 2017 | Denmark       | QL (interview)    | 14                                   | 2/12                                | Range=18-25 Mean=20.6       | 15 Parents<br>10 Mother<br>5 Father | Multiple Sclerosis        | <ul style="list-style-type: none"> <li>Perceived normality of role and identifying as a carer (type of caring task and how they help identify as a carer)</li> </ul>                                                                                                                      | 100%           |

**Supplementary Table S1.** Summary of study characteristics of identified studies, including MMAT score

| Source                                                                                                                                                                       | Year | Setting   | Design (QT/QL/MM) | YIC Sample Size | Male/ Female          | Age, Mean (SD) or range | Relationship to care-recipient          | Illness of care-recipient | Theme/measures used                                                                                                                                                                                                                                                                                                                              | MMAT Score (%) |
|------------------------------------------------------------------------------------------------------------------------------------------------------------------------------|------|-----------|-------------------|-----------------|-----------------------|-------------------------|-----------------------------------------|---------------------------|--------------------------------------------------------------------------------------------------------------------------------------------------------------------------------------------------------------------------------------------------------------------------------------------------------------------------------------------------|----------------|
| restraint: young adults' experiences with parental multiple sclerosis                                                                                                        |      |           |                   |                 |                       |                         |                                         |                           | <ul style="list-style-type: none"> <li>• Social Support from formal and unpaid networks (lack of openness and knowledge)</li> <li>• Caring demands (participant emotions in reaction to caring, worry and guilt, shame, anxiety, depression)</li> <li>• Coping strategies (choosing health professions, advantages of responsibility)</li> </ul> |                |
| <b>Lakman, Chalmers, &amp; Sexton.</b> Young carers' educational experiences and support: A roadmap for the development of school policies to foster their academic success. | 2017 | Canada    | QT (survey)       | 145             | 58/82 (5 undisclosed) | Range=8-18<br>Mean=12   | N/A                                     | N/A                       | Not mentioned – related to social support (education)                                                                                                                                                                                                                                                                                            | 100%           |
| <b>Bowman, Alvarez-Jimenez, Wade et al.</b> The positive and negative experiences of caregiving for siblings of young                                                        | 2017 | Australia | QT (survey)       | 157             | 81/76                 | Mean=21.7 (4.4)         | 157 Siblings<br>81 Brother<br>76 Sister | Early Psychosis           | <ul style="list-style-type: none"> <li>• Caring demands: Experience of Caregiving Inventory (mental health issues)</li> <li>• Coping strategies: Experience of Caregiving Inventory</li> </ul>                                                                                                                                                   | 80%            |

**Supplementary Table S1.** Summary of study characteristics of identified studies, including MMAT score

| Source                                                                                                                             | Year | Setting              | Design (QT/QL/MM)          | YIC Sample Size | Male/ Female | Age, Mean (SD) or range          | Relationship to care-recipient | Illness of care-recipient                                                              | Theme/measures used                                                                                                                                                                                                                                             | MMAT Score (%) |
|------------------------------------------------------------------------------------------------------------------------------------|------|----------------------|----------------------------|-----------------|--------------|----------------------------------|--------------------------------|----------------------------------------------------------------------------------------|-----------------------------------------------------------------------------------------------------------------------------------------------------------------------------------------------------------------------------------------------------------------|----------------|
| people with first episode psychosis.                                                                                               |      |                      |                            |                 |              |                                  |                                |                                                                                        |                                                                                                                                                                                                                                                                 |                |
| <b>Heyman.</b> What do young adult carers learn through supporting family members? Extending the affirmation model                 | 2018 | England, UK          | QL (biographical accounts) | 13              | 8/5          | Range=16-30                      | N/A                            | Physical disability, Acute illness, Learning disability                                | <ul style="list-style-type: none"> <li>• Caring demands (skills learned)</li> <li>• Coping strategies (learning valued, personal growth, self-assertion)</li> </ul>                                                                                             | 100%           |
| <b>Spratt, McGibbon, &amp; Davidson.</b> Using Adverse Childhood Experience Scores to Better Understand the Needs of Young Carers. | 2018 | Northern Ireland, UK | MM (Interview + survey)    | 16/22           | 4/18         | Range=8-18                       | Parent                         | Mental Illness                                                                         | <ul style="list-style-type: none"> <li>• Perceived normality of role and identifying as a carer (feeling used to caring due to caring for a long time)</li> <li>• Caring demands: Adverse Childhood Experiences Questionnaire (mental illness, etc.)</li> </ul> | 60%            |
| <b>Nuttall, Coberly, &amp; Diesel.</b> Childhood Caregiving Roles, Perceptions of Benefits, and                                    | 2018 | United States        | QT (survey)                | ~68/108         | N/A          | Range=18-25<br>Mean=18.14 (5.49) | Siblings                       | Autism Spectrum Disorder<br>Autism<br>Asperger's<br>Pervasive Developmental Disability | <ul style="list-style-type: none"> <li>• Perceived normality of role and identifying as a carer (Parentification Inventory, Intention for Caring Involvement in the Future)</li> </ul>                                                                          | 80%            |

**Supplementary Table S1.** Summary of study characteristics of identified studies, including MMAT score

| Source                                                                                                                                            | Year | Setting     | Design (QT/QL/MM) | YIC Sample Size                           | Male/ Female | Age, Mean (SD) or range                | Relationship to care-recipient                                           | Illness of care-recipient                                                      | Theme/measures used                                                                                                                                                                                                                                                                                                                                                                                   | MMAT Score (%) |
|---------------------------------------------------------------------------------------------------------------------------------------------------|------|-------------|-------------------|-------------------------------------------|--------------|----------------------------------------|--------------------------------------------------------------------------|--------------------------------------------------------------------------------|-------------------------------------------------------------------------------------------------------------------------------------------------------------------------------------------------------------------------------------------------------------------------------------------------------------------------------------------------------------------------------------------------------|----------------|
| Future Caregiving Intentions Among Typically Developing Adult Siblings of Individuals with Autism Spectrum Disorder.                              |      |             |                   |                                           |              |                                        |                                                                          |                                                                                | <ul style="list-style-type: none"> <li>Coping Strategies: Autism benefit-finding scale</li> </ul>                                                                                                                                                                                                                                                                                                     |                |
| <b>Leu, Frech, &amp; Jung.</b> Young carers and young adult carers in Switzerland: Caring roles, ways into care and the meaning of communication. | 2018 | Switzerland | QL (interview)    | 29                                        | 5/23         | Range=10-25                            | 19 Parents<br>16 Mothers<br>2 Fathers<br><br>9 siblings<br>1 Grandparent | 15 Physical impairment<br>10 Mental Impairment<br>1 Addition<br>3 No diagnosis | <ul style="list-style-type: none"> <li>Perceived normality of role and identifying as a carer (pathways into caring; awareness of roles)</li> <li>Social Support from formal and unpaid networks (communication about the caring situation with family, professionals, friends, extended family and stigma)</li> <li>Caring demands (nature of caring roles and intensity of caring roles)</li> </ul> | 80%            |
| <b>Boumans &amp; Dorant.</b> A cross-sectional study on experiences of young adult carers compared to young adult noncarers:                      | 2018 | Netherlands | QT (survey)       | 297<br><br>School 1: 181<br>School 2: 116 | 65/232       | Range=18-24<br><br>School 1: Mean=18.9 | N/A                                                                      | Chronic disease, physical and intellectual disability                          | <ul style="list-style-type: none"> <li>Perceived normality of role and identifying as a carer (Parentification, Maastricht Parentification Scale)</li> <li>Coping Strategies: Brief Resilience Scale, Utrechtse Coping Lijst</li> </ul>                                                                                                                                                               | 100%           |

**Supplementary Table S1.** Summary of study characteristics of identified studies, including MMAT score

| Source                                                                                                                                                                        | Year | Setting   | Design (QT/QL/MM) | YIC Sample Size                           | Male/ Female  | Age, Mean (SD) or range | Relationship to care-recipient                                                                                       | Illness of care-recipient                                                                                   | Theme/measures used                                                                                                                                                                                                                                                                                                                                                                                                          | MMAT Score (%) |
|-------------------------------------------------------------------------------------------------------------------------------------------------------------------------------|------|-----------|-------------------|-------------------------------------------|---------------|-------------------------|----------------------------------------------------------------------------------------------------------------------|-------------------------------------------------------------------------------------------------------------|------------------------------------------------------------------------------------------------------------------------------------------------------------------------------------------------------------------------------------------------------------------------------------------------------------------------------------------------------------------------------------------------------------------------------|----------------|
| parentification, coping and resilience                                                                                                                                        |      |           |                   |                                           |               | School 2: Mean=19.0     |                                                                                                                      |                                                                                                             |                                                                                                                                                                                                                                                                                                                                                                                                                              |                |
| <b>McDougall, O'Connor, &amp; Howell.</b><br>"Something that happens at home and stays at home": An exploration of the lived experience of young carers in Western Australia. | 2018 | Australia | QL (interview)    | 13<br><br>1ary (n=4),<br>2ary carer (n=9) | 6/7           | Range=14-25<br>Mean=18  | 7 cared for parents and grandparents<br>7 cared for siblings<br>1 cared for cousins<br>1 cared for non-family member | Disability, mental illness, chronic condition, terminal illness, alcohol or other drug issue, or frail aged | <ul style="list-style-type: none"> <li>Perceived normality of role and identifying as a carer (not disclosing identity due to desire for normalcy and privacy)</li> <li>Social Support from formal and unpaid networks (solace in socialising and solidarity, lost in the system)</li> <li>Caring demands (navigating competing demands)</li> <li>Coping Strategies (Lessons from Experience, solace in solitude)</li> </ul> | 100%           |
| <b>Kallander, Weimand, Becker et al.</b><br>Children with ill parents: extent and nature of caring activities                                                                 | 2018 | Norway    | QT (survey)       | 246                                       | 106.03/139.97 | Range=8-17              | 238 Parents                                                                                                          | 135 physical illness (neurological disease or cancer)<br>75 mental illness<br>28 substance abuse            | <ul style="list-style-type: none"> <li>Perceived normality of role and identifying as a carer: Family Adaptability and Cohesion Evaluation Scale</li> <li>Social Support from formal and unpaid networks: Interpersonal Support Evaluation List</li> <li>Caring demands: Multidimensional Assessment of Caring Activities (MACA), Social</li> </ul>                                                                          | 100%           |

**Supplementary Table S1.** Summary of study characteristics of identified studies, including MMAT score

| Source                                                                                                               | Year | Setting | Design (QT/QL/MM)             | YIC Sample Size | Male/ Female | Age, Mean (SD) or range | Relationship to care-recipient    | Illness of care-recipient                                                                                                                                                                           | Theme/measures used                                                                                                                                                                                                                                                                                                                                                                                                                                                                                                                                                          | MMAT Score (%) |
|----------------------------------------------------------------------------------------------------------------------|------|---------|-------------------------------|-----------------|--------------|-------------------------|-----------------------------------|-----------------------------------------------------------------------------------------------------------------------------------------------------------------------------------------------------|------------------------------------------------------------------------------------------------------------------------------------------------------------------------------------------------------------------------------------------------------------------------------------------------------------------------------------------------------------------------------------------------------------------------------------------------------------------------------------------------------------------------------------------------------------------------------|----------------|
|                                                                                                                      |      |         |                               |                 |              |                         |                                   |                                                                                                                                                                                                     | <ul style="list-style-type: none"> <li>Skills Rating System, Health Survey SF-8, Hopkins Symptoms Checklist, Family Adaptability and Cohesion Evaluation Scale</li> <li>Coping Strategies: Family Adaptability and Cohesion Evaluation Scale</li> </ul>                                                                                                                                                                                                                                                                                                                      |                |
| <b>Stamatopoulos.</b><br>The young carer penalty: Exploring the costs of caregiving among a sample of Canadian youth | 2018 | Canada  | QL (interview + focus groups) | 15              | 3/12         | Range=15-19<br>Mean=16  | Siblings (50%+)<br>Parent<br>Both | Substance Abuse (alcohol)<br>Terminal Cancer<br>Autism<br>Comorbid conditions<br>Physical illness and/or disability (e.g., late-stage cancer, stroke, and diabetes resulting in double amputation). | <ul style="list-style-type: none"> <li>Perceived normality of role and identifying as a carer (balancing caring with youth; disclosure of caring identity)</li> <li>Social Support from formal and unpaid networks (friendship sustainability and social media use; isolation; future decisions with care-recipient in mind)</li> <li>Caring demands: personal penalties like familial strain, limited social opportunities, emotional health and wellbeing, penalties in education and employment</li> <li>Coping Strategies: benefits of youth-based caregiving</li> </ul> | 100%           |

**Supplementary Table S1.** Summary of study characteristics of identified studies, including MMAT score

| Source                                                                                                                                                     | Year | Setting                     | Design (QT/QL/MM)          | YIC Sample Size | Male/ Female | Age, Mean (SD) or range  | Relationship to care-recipient                                                                                                                                                                                                                    | Illness of care-recipient                                                                                                          | Theme/measures used                                                                                                                                                                                                                                                                                                                                                        | MMAT Score (%) |
|------------------------------------------------------------------------------------------------------------------------------------------------------------|------|-----------------------------|----------------------------|-----------------|--------------|--------------------------|---------------------------------------------------------------------------------------------------------------------------------------------------------------------------------------------------------------------------------------------------|------------------------------------------------------------------------------------------------------------------------------------|----------------------------------------------------------------------------------------------------------------------------------------------------------------------------------------------------------------------------------------------------------------------------------------------------------------------------------------------------------------------------|----------------|
| <b>Becker &amp; Sempik.</b> Young Adult Carers: The Impact of Caring on Health and Education.                                                              | 2019 | UK (no further information) | QT (survey)                | 295             | 62/231       | Range=14-25<br>Mean=18.8 | 154 mother<br>41 father<br>12 both parents<br>63 cared for siblings/step-siblings<br>12 cared for grandparents<br><br>200 (68%) cared for 1 person, 72 (24%) cared for two people, 10 (3%) cared for three people, 13 (4%) cared for four+ people | 163 Physical disability<br>139 Long term illness<br>144 Mental ill health<br>69 Learning disabilities<br>34 Old Age<br>13 Dementia | <ul style="list-style-type: none"> <li>Caring demands: Multidimensional Assessment of Caring Activities (MACA) for level of caring and perceived health, perceptions of school, college and university, impact of caring on education</li> </ul>                                                                                                                           | 80%            |
| <b>Järkestig-Berggren, Bergman, Eriksson, et al.</b> Young carers in Sweden—A pilot study of care activities, view of caring, and psychological well-being | 2019 | Sweden                      | MM (survey + focus groups) | 30              | 7/23         | Range=10-18              | 21 Mother<br>19 Sibling<br>15 Father<br>16 children explicitly stated that they help more than one person.                                                                                                                                        | Parental addiction, mental health problems, or violence against a parent                                                           | <ul style="list-style-type: none"> <li>Social Support from formal and unpaid networks (perceptions of caring based on family recognition and support)</li> <li>Caring demands: Multidimensional Assessment of Caring Activities (MACA) and Positive and Negative Outcomes of Caring (PANOC), KIDSCREEN and Strengths and Difficulties Questionnaire for health-</li> </ul> | 80%            |

**Supplementary Table S1.** Summary of study characteristics of identified studies, including MMAT score

| Source                                                                                                                                               | Year | Setting              | Design (QT/QL/MM)         | YIC Sample Size | Male/ Female | Age, Mean (SD) or range       | Relationship to care-recipient                                                  | Illness of care-recipient                                                                                                      | Theme/measures used                                                                                                                                                                                                                                                                                                                                                                                                                     | MMAT Score (%) |
|------------------------------------------------------------------------------------------------------------------------------------------------------|------|----------------------|---------------------------|-----------------|--------------|-------------------------------|---------------------------------------------------------------------------------|--------------------------------------------------------------------------------------------------------------------------------|-----------------------------------------------------------------------------------------------------------------------------------------------------------------------------------------------------------------------------------------------------------------------------------------------------------------------------------------------------------------------------------------------------------------------------------------|----------------|
|                                                                                                                                                      |      |                      |                           |                 |              |                               |                                                                                 |                                                                                                                                | <ul style="list-style-type: none"> <li>related quality of life and psychological wellbeing</li> <li>Demographic variables: Family Affluence Scale</li> </ul>                                                                                                                                                                                                                                                                            |                |
| <b>McGibbon, Spratt, &amp; Davidson.</b> Young Carers in Northern Ireland: Perceptions of and Responses to Illness and Disability within the Family. | 2019 | Northern Ireland, UK | QL (interview)            | 22              | 4/18         | Range=8-18<br>Mean=14         | Parent and sibling 11 young carers were providing care for more than one person | 16 mental health problems<br>8 comorbid physical/mental illness)<br>Care-recipients under 18: cerebral palsy, ADHD and autism. | <ul style="list-style-type: none"> <li>Perceived normality of role and identifying as a carer (choice in caregiving, feelings of obligation, awareness of role through interaction with other carers)</li> <li>Caring demands (impact of physical illness, spreading out responsibility and caring for sibling)</li> <li>Coping Strategies (heightened intuition, building resilience, gratitude and closeness with sibling)</li> </ul> | 100%           |
| <b>Lakman, &amp; Chalmers.</b> Psychosocial comparison of carers and noncarers.                                                                      | 2019 | Canada               | QT (Comparative Analysis) | 124/248         | 52/72        | Range=10-17<br>(Mean unclear) | N/A                                                                             | N/A                                                                                                                            | <ul style="list-style-type: none"> <li>Caring demands: Dimensions of Temperament Survey, Youth Leisure Study and Life Optimism Test, Depression Scale (CES-D), Rosenberg's self-esteem scale, Ginsburg, LaGrevia and Silverman social Anxiety scale, Louvain Loneliness Scale for Children and Adolescence</li> </ul>                                                                                                                   | 80%            |



**Supplementary Table S1.** Summary of study characteristics of identified studies, including MMAT score

| Source | Year | Setting | Design<br>(QT/QL/MM) | YIC<br>Sample<br>Size | Male/<br>Female | Age,<br>Mean<br>(SD) or<br>range | Relationship to<br>care-recipient | Illness of care-recipient | Theme/measures used                                                                                                                                                                                                  | MMAT<br>Score<br>(%) |
|--------|------|---------|----------------------|-----------------------|-----------------|----------------------------------|-----------------------------------|---------------------------|----------------------------------------------------------------------------------------------------------------------------------------------------------------------------------------------------------------------|----------------------|
|        |      |         |                      |                       |                 |                                  |                                   |                           | <ul style="list-style-type: none"><li>Social Support from formal and unpaid networks:<br/>Louvain Loneliness Scale for Children and Adolescence &amp; Ginsburg, LaGrevé and Silverman social Anxiety scale</li></ul> |                      |
